# Supplementary material for: Thermodynamic Modeling of the Amorphous Solid Dispersion-Water Interfacial Layer and Its Impact on the Release Mechanism
Source: MDPI journal article supplement (doi:10.3390/pharmaceutics15051539), 2023-05-19
Supplement: s1 [file s1]

# Supplementary Materials: Thermodynamic modeling of the amorphous solid dispersion-water interfacial layer and its impact on the release mechanism

Stefanie Dohrn, Samuel O. Kyeremateng, Esther Bochmann, Ekaterina Sobich, Andrea Wahl, Bernd Liepold, Gabriele Sadowski, and Matthias Degenhardt

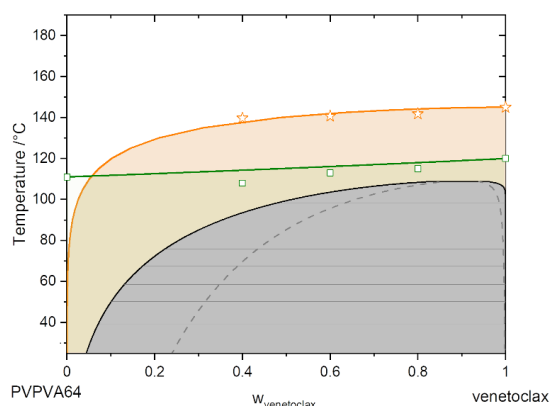

**Figure S1.** Phase diagram of venetoclax and PVPVA64. The orange line represents the PC-SAFT calculated solubility line, the black and dashed gray lines are PC-SAFT predicted binodal and spinodal lines, respectively, and the green line is the Gordon-Taylor predicted glass-transition line (glassy in the green region below the green line). The mixture is homogeneous in the white region, venetoclax is supersaturated in the matrix in the orange region below the solubility line, and crystallization can occur. Liquid-liquid phase separation (LLPS) and crystallization occur in the gray region. The points represent experimental data, solubility measurements (orange stars), and glass transition temperature (green circles) obtained by DSC measurements based on methods reported by Kyeremateng et al.[1].

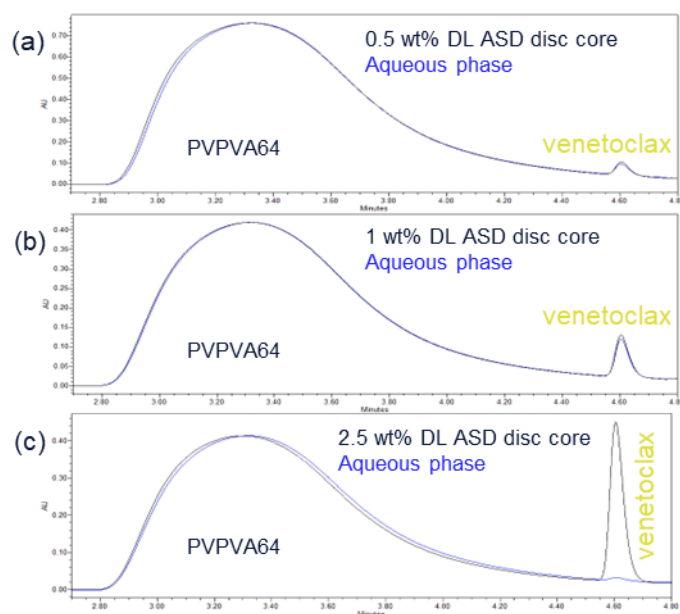

**Figure S2.** SEC overlay chromatograms of the ASD disc core and the aqueous phase around the ASD after 60 min dissolution of (a) 0.5 wt% DL, (b) 2.5 wt% DL, and (c) 2.5 wt% DL venetoclax ASDs.

**Table S1.** Venetoclax solubility in water, 2-propanol, and ethyl acetate.

|               | T / °C | W <sub>venetoclax</sub> | stdev                   |
|---------------|--------|-------------------------|-------------------------|
| Water         |        |                         |                         |
|               | 10     | 1.129*10 <sup>-08</sup> | 1.529*10 <sup>-09</sup> |
|               | 25     | 1.286*10 <sup>-07</sup> | 6.739*10 <sup>-08</sup> |
|               | 40     | 3.186*10 <sup>-07</sup> | 2.781*10 <sup>-07</sup> |
| 2-propanol    |        |                         |                         |
|               | 10     | 0.00044                 | 0.00007                 |
|               | 25     | 0.00171                 | 0.00115                 |
|               | 40     | 0.00701                 | 0.00063                 |
| ethyl acetate |        |                         |                         |
|               | 10     | 0.00439                 | 0.00111                 |
|               | 25     | 0.00657                 | 0.00025                 |
|               | 40     | 0.00988                 | 0.00208                 |

**Table S2.** Naproxen/PVPVA64/water concentrations along the hydration pathway for 10 wt%, 20 wt%, and 30wt% DL naproxen ASDs at 50 °C and calculated corresponding  $T_g$ .

|                                    | water                               | naproxen  | PVPVA64   | $T_g$ / °C |
|------------------------------------|-------------------------------------|-----------|-----------|------------|
| 10 wt% DL in dry ASD               |                                     |           |           |            |
| ASD                                | 0 wt%                               | 10 wt%    | 90 wt%    | 94.6       |
| eGT                                | 6.87 wt%                            | 9.31 wt%  | 83.81 wt% | 50.0       |
| Solubility limit                   | 19.10 wt%                           | 8.09 wt%  | 72.81 wt% | -5.7       |
| Polymer-rich phase at binodal line | 30.84 wt%                           | 6.92 wt%  | 62.24 wt% | -42.2      |
| API-rich phase at binodal line     | 11.19 wt%                           | 34.88 wt% | 53.93 wt% | 2.9        |
| 20 wt% DL in dry ASD               |                                     |           |           |            |
| ASD                                | 0 wt%                               | 20 wt%    | 80 wt%    | 79.6       |
| eGT                                | 4.9 wt%                             | 19.0 wt%  | 76.1 wt%  | 50.0       |
| Solubility limit                   | 9.5 wt%                             | 18.1 wt%  | 72.4 wt%  | 26.3       |
| Polymer-rich phase at binodal line | 20.61%                              | 15.88%    | 63.51%    | -17.1      |
| API-rich phase at binodal line     | 16.76%                              | 20.87%    | 62.38%    | -7.2       |
| 30 wt% DL in dry ASD               |                                     |           |           |            |
| ASD                                | 0 wt%                               | 30 wt%    | 70 wt%    | 65.6       |
| eGT                                | 2.7 wt%                             | 29.2%     | 68.1 wt%  | 50.0       |
| Solubility limit                   | API supersaturated in the dry state |           |           |            |
| Polymer-rich phase at binodal line | 24.54%                              | 11.21%    | 64.25%    | -26.6      |
| API-rich phase at binodal line     | 14.07%                              | 25.78%    | 60.15%    | -0.9       |

**Table S3.** Venetoclax/PVPVA64/water concentrations along hydration pathway for 1 wt% and 2.5 wt% DL venetoclax ASDs at 50 °C, and calculated corresponding  $T_g$ .

|                                    | water                               | venetoclax | PVPVA64  | $T_g$ / °C |
|------------------------------------|-------------------------------------|------------|----------|------------|
| 1 wt% DL in dry ASD                |                                     |            |          |            |
| ASD                                | 0 wt%                               | 1.0 wt%    | 99.0 wt% | 111.1      |
| eGT                                | 8.8 wt%                             | 0.9 wt%    | 90.3 wt% | 50.0       |
| Solubility limit                   | API supersaturated in the dry state |            |          |            |
| Polymer-rich phase at binodal line | 20.5 wt%                            | 0.9 wt%    | 78.6 wt% | -4.4       |
| API-rich phase at binodal line     | 0.8 wt%                             | 99.2 wt%   | 0.0 wt%  | 111.9      |
| 2.5 wt% DL in dry ASD              |                                     |            |          |            |
| ASD                                | 0 wt%                               | 2.5 wt%    | 97.5 wt% | 111.2      |
| eGT                                | 8.8 wt%                             | 2.3 wt%    | 88.9 wt% | 50.0       |
| Solubility limit                   | API supersaturated in the dry state |            |          |            |

---

|                                    |          |          |          |       |
|------------------------------------|----------|----------|----------|-------|
| Polymer-rich phase at binodal line | 10.0 wt% | 2.5 wt%  | 87.6 wt% | 43.6  |
| API-rich phase at binodal line     | 0.4 wt%  | 99.6 wt% | 0.0 wt%  | 116.4 |

---

## Reference

1. Kyeremateng, S.O.; Pudlas, M.; Woehrle, G.H. A fast and reliable empirical approach for estimating solubility of crystalline drugs in polymers for hot melt extrusion formulations. *J. Pharm. Sci.* **2014**, *103*, 2847–2858.
