# Supplementary material for: Thermodynamic Modeling of the Amorphous Solid Dispersion-Water Interfacial Layer and Its Impact on the Release Mechanism
Source: Pharmaceutics. 2023 May 19;15(5):1539. doi: 10.3390/pharmaceutics15051539 (PMC10221441; doi:10.3390/pharmaceutics15051539)
Supplement: Supplementary file 1 [file pharmaceutics-15-01539-s001.zip]

Archive with 12 entries (12 files):
- 0.5wt% DL VenetoPVPVA64_37°C.mp4
- 10wt% DL NapPVPVA64_37°C.mp4
- 10wt% DL NapPVPVA64_50°C.mp4
- 1wt% DL VenetoPVPVA64_37°C.mp4
- 1wt% DL VenetoPVPVA64_50°C.mp4
- 2.5wt% DL VenetoPVPVA64_37°C.mp4
- 2.5wt% DL VenetoPVPVA64_50°C.mp4
- 20wt% DL NapPVPVA64_37°C.mp4
- 20wt% DL NapPVPVA64_50°C.mp4
- 30wt% DL NapPVPVA64_37°C.mp4
- 30wt% DL NapPVPVA64_50°C.mp4
- pharmaceutics-2365277-supplementary.pdf
